# Supplementary material for: Reorganization of 3D genome structure may contribute to gene regulatory evolution in primates
Source: PubMed Central journal article supplement (PMC6668850; doi:10.1371/journal.pgen.1008278), 2019-07-19
Supplement: pgen.1008278.s004.pdf [file pgen.1008278.s004.pdf]

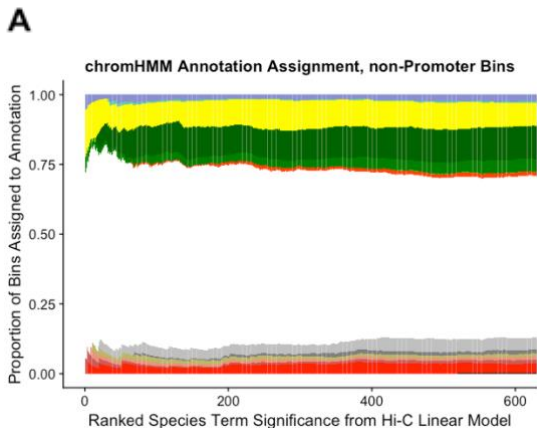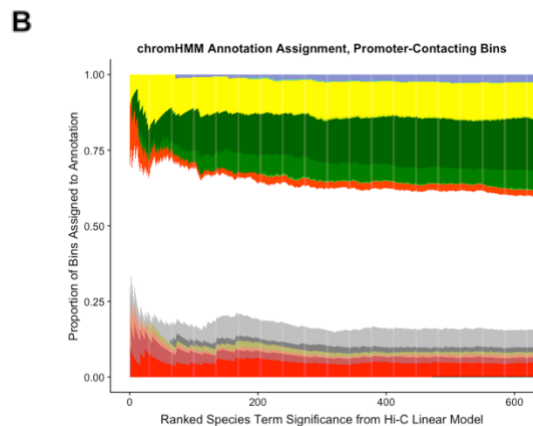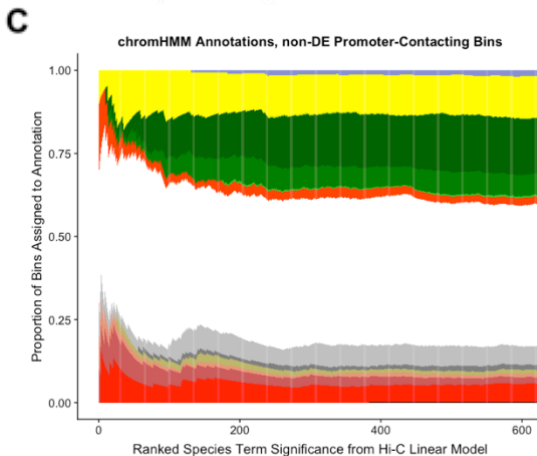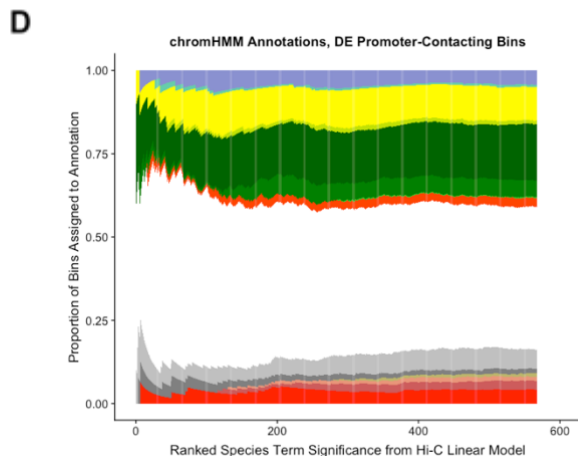

**Annotations**

- Nothing
- TssA
- TssBiv
- BivFlnk
- EnhBiv
- ReprPC
- ReprPCWk
- Quies
- TssAFlnk
- TxFlnk
- Tx
- TxWk
- EnhG
- Enh
- ZNF/Rpts
- Het
