# Supplementary material for: Reorganization of 3D genome structure may contribute to gene regulatory evolution in primates
Source: PubMed Central journal article supplement (PMC6668850; doi:10.1371/journal.pgen.1008278), 2019-07-19

**A** Enrichment of H3K27ac Overlapping Promoter Hi-C Bins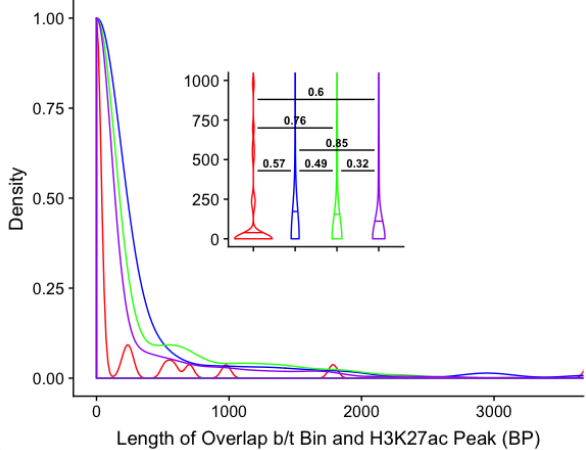**B** Enrichment of H3K4me3 Overlapping Promoter Hi-C Bins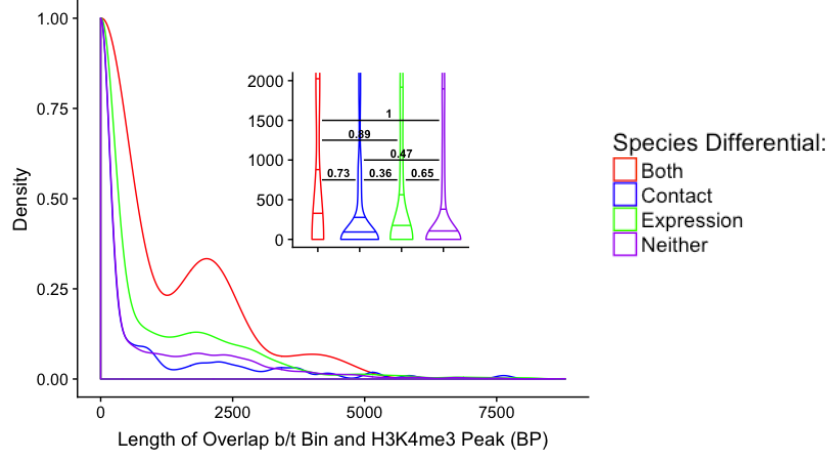**C** Enrichment of H3K4me1 Overlapping Promoter Hi-C Bins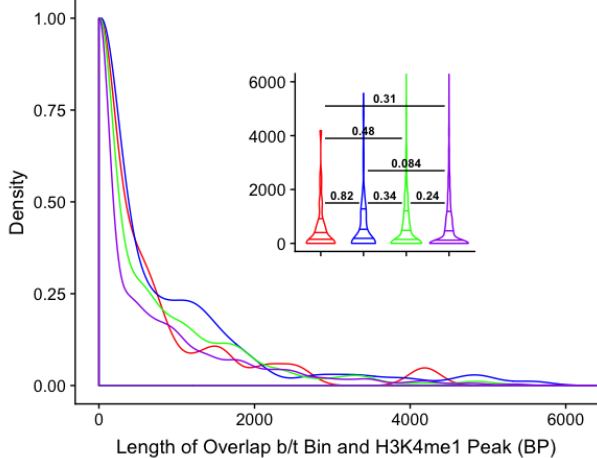**D** Enrichment of H3K27me3 Overlapping Promoter Hi-C Bins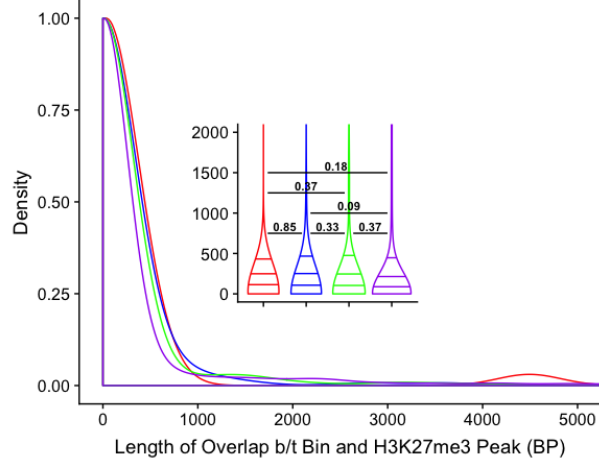

Supplement: pgen.1008278.s005.pdf [file pgen.1008278.s005.pdf]
