# Supplementary material for: Reorganization of 3D genome structure may contribute to gene regulatory evolution in primates
Source: PubMed Central journal article supplement (PMC6668850; doi:10.1371/journal.pgen.1008278), 2019-07-19

**A****Distributions of Homer-Significant Hi-C Contacts; Humans**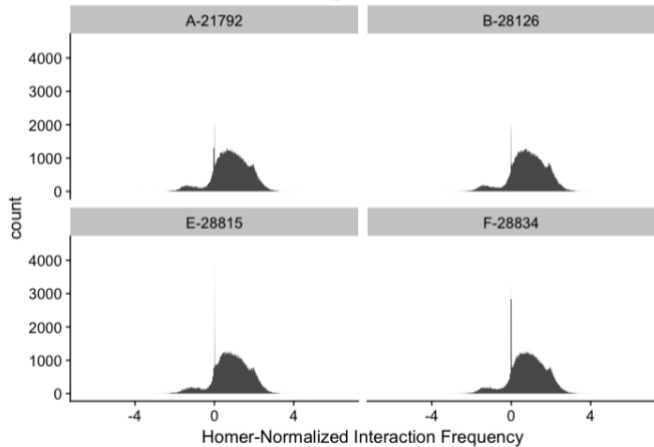**B****Distributions of Homer-Significant Hi-C Contacts; Chimpanzees**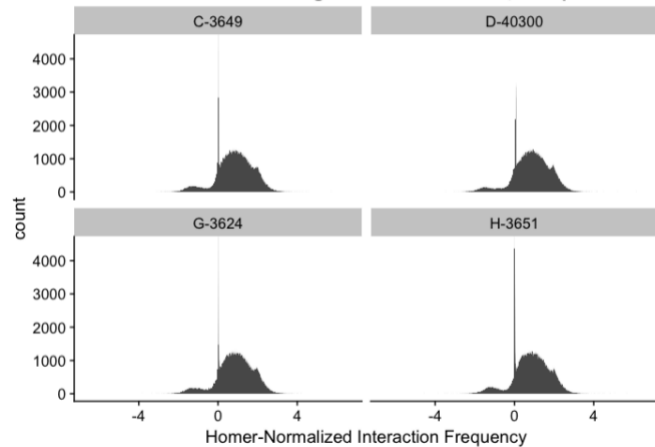

Supplement: pgen.1008278.s008.pdf [file pgen.1008278.s008.pdf]
