# Supplementary material for: Reorganization of 3D genome structure may contribute to gene regulatory evolution in primates
Source: PubMed Central journal article supplement (PMC6668850; doi:10.1371/journal.pgen.1008278), 2019-07-19

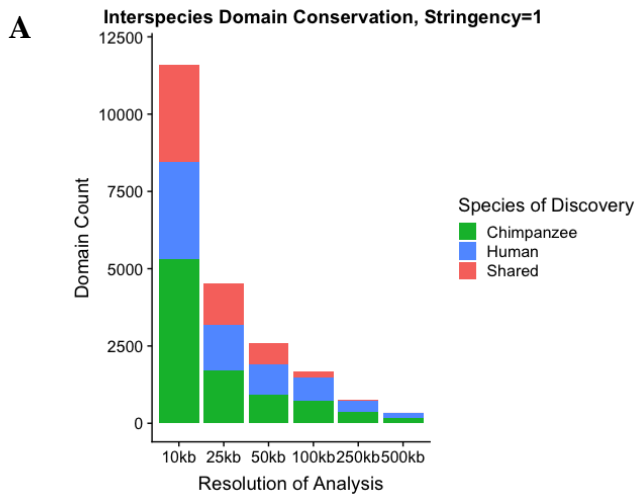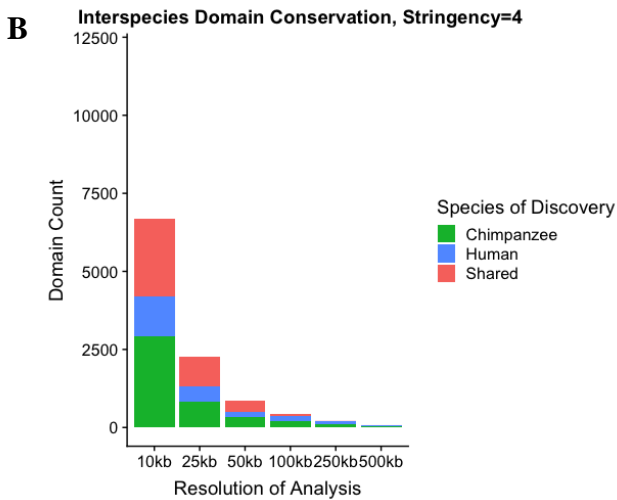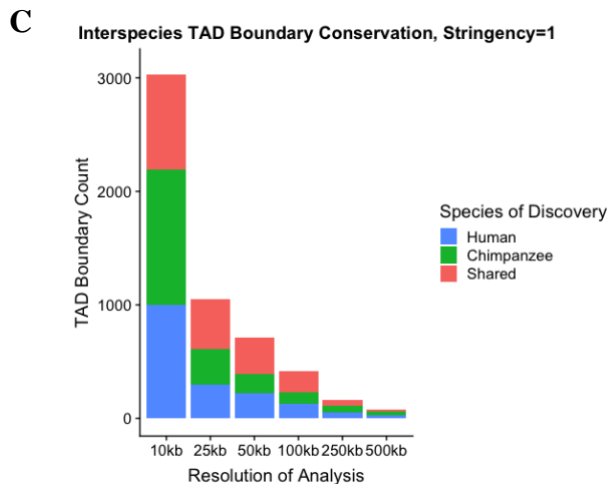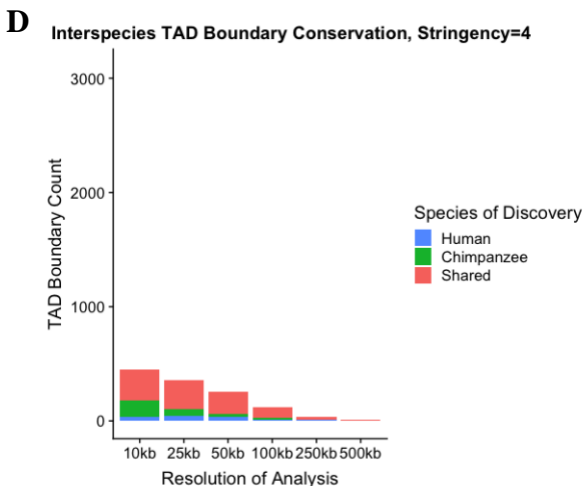

**E** Pairwise Proportions of Shared TADs @ 10kb

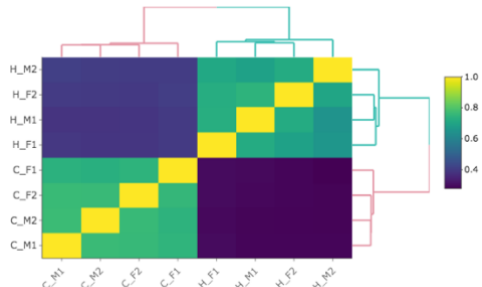

Pairwise Proportions of Shared TADs @ 25kb

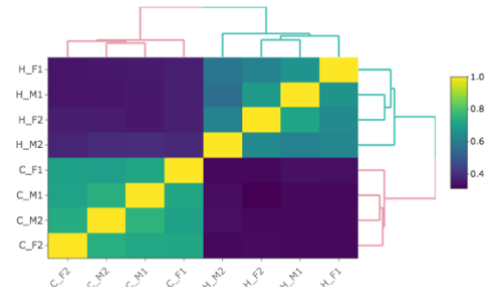

Pairwise Proportions of Shared TADs @ 50kb

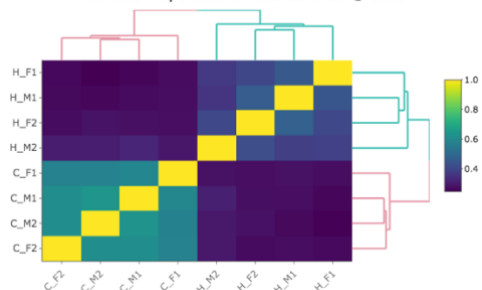

Pairwise Proportions of Shared TADs @ 100kb

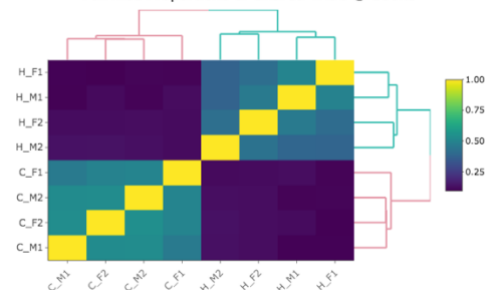

Pairwise Proportions of Shared TADs @ 250kb

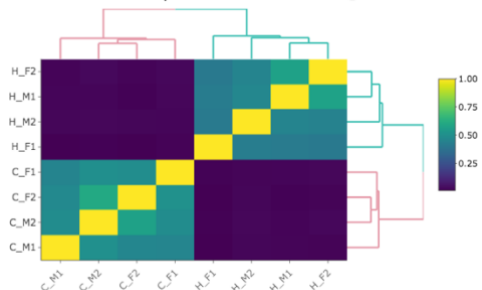

Pairwise Proportions of Shared TADs @ 500kb

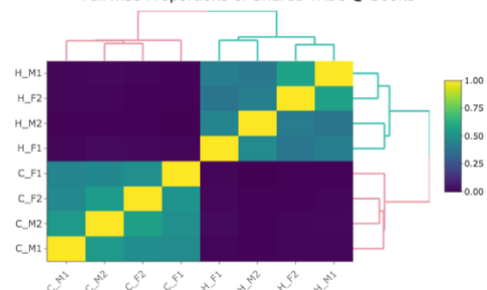

**F**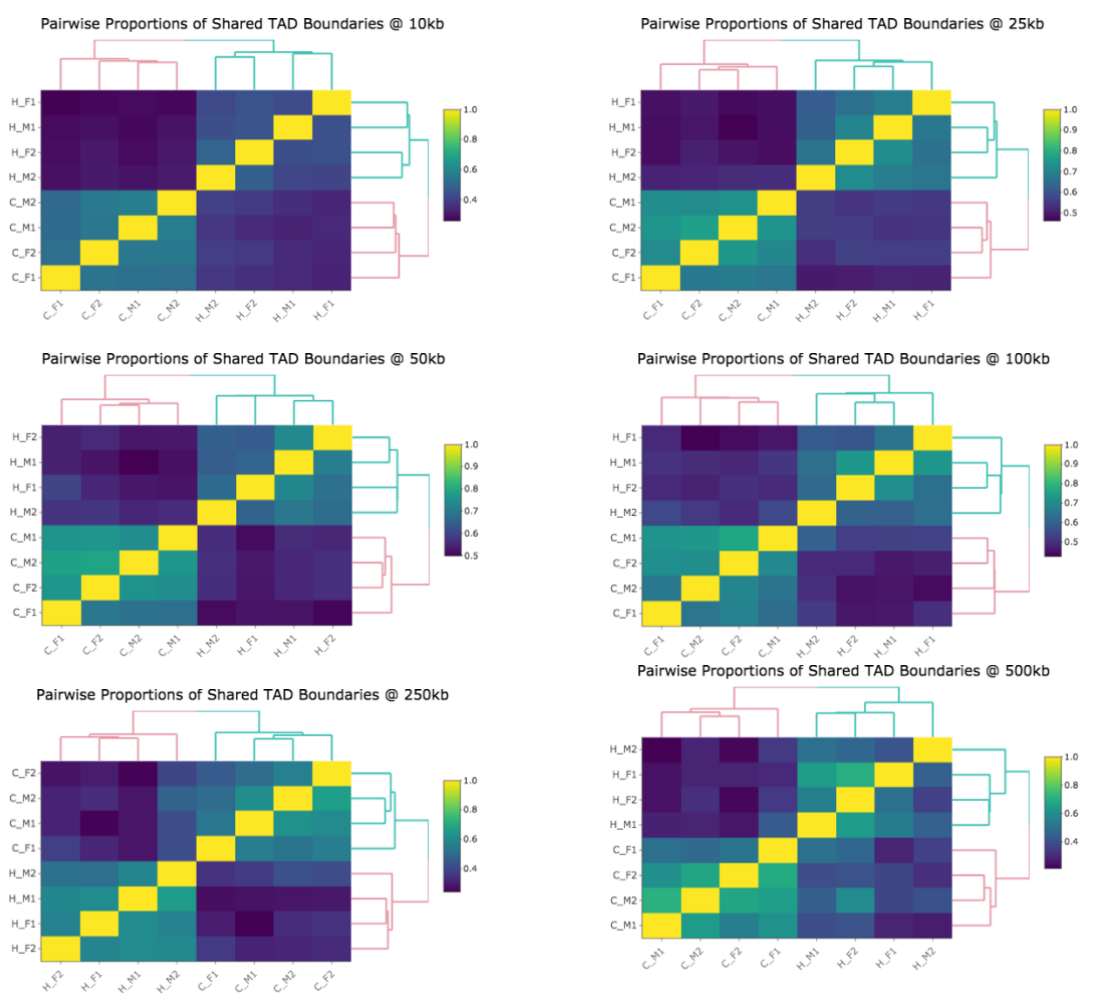

Supplement: pgen.1008278.s014.pdf [file pgen.1008278.s014.pdf]
