# Supplementary material for: Reorganization of 3D genome structure may contribute to gene regulatory evolution in primates
Source: PubMed Central journal article supplement (PMC6668850; doi:10.1371/journal.pgen.1008278), 2019-07-19

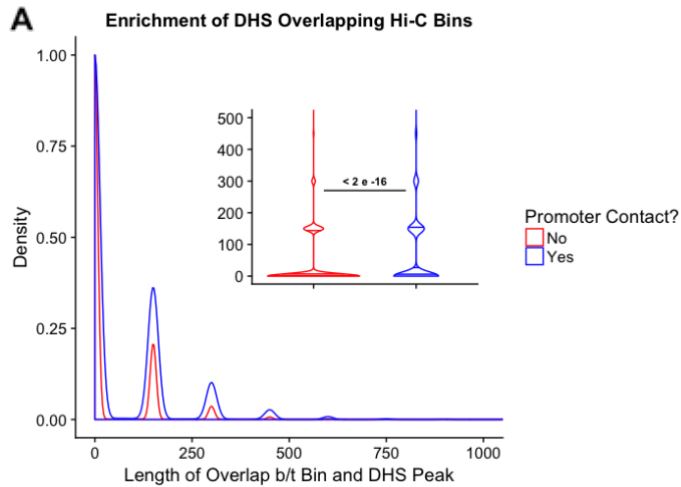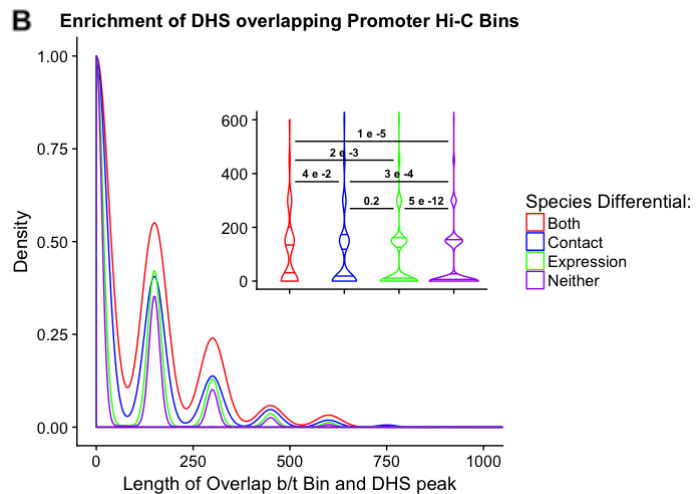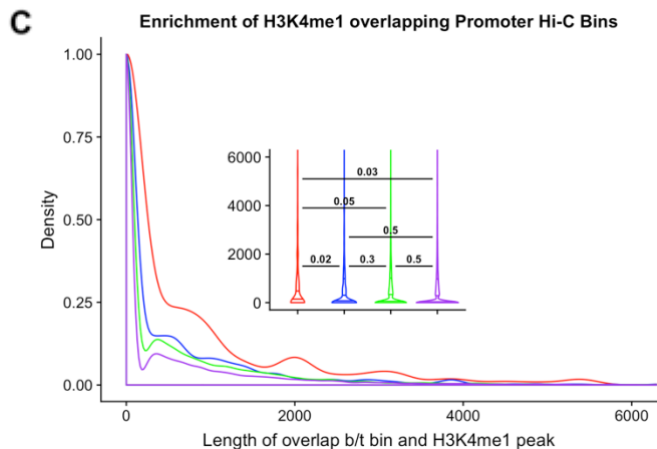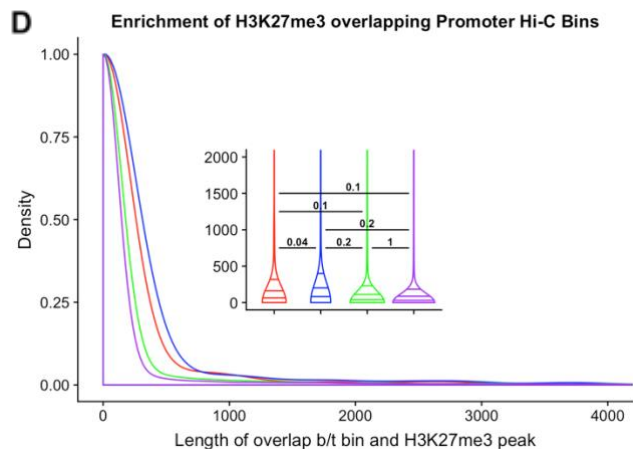

Supplement: pgen.1008278.s018.pdf [file pgen.1008278.s018.pdf]
