# Supplementary material for: Reorganization of 3D genome structure may contribute to gene regulatory evolution in primates
Source: PLOS journal article supplement (doi:10.1371/journal.pgen.1008278), 2019-07-19

**A**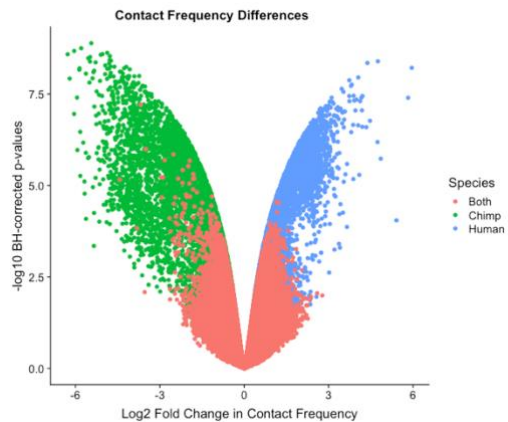**C**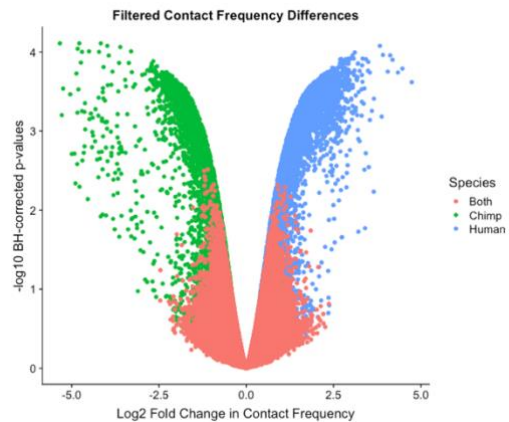**B**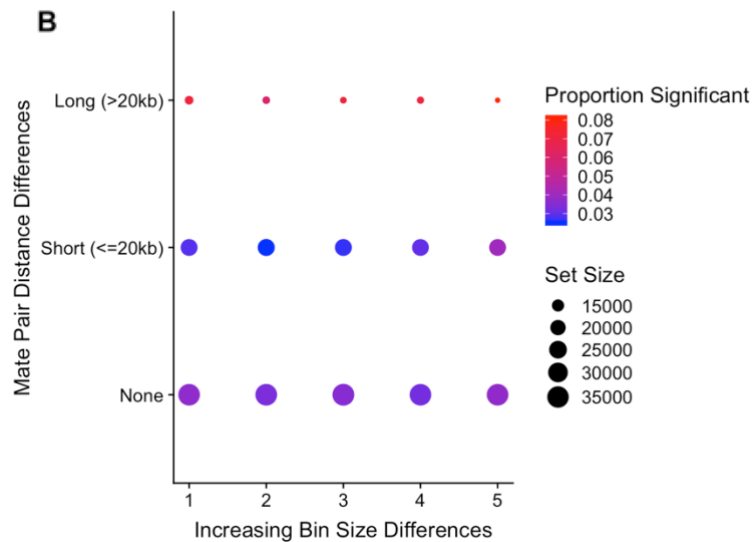

Supplement: S9 (10.1371/journal.pgen.1008278.s009) [file journal.pgen.1008278.s009]
